# Supplementary material for: Usefulness of Digital Game-Based Learning in Nursing and Occupational Therapy Degrees: A Comparative Study at the University of Burgos
Source: MDPI journal article supplement (doi:10.3390/ijerph182211757), 2021-11-09
Supplement: s1 [file s1]

## Supplementary Materials

**Table S1.** Examples of the activities applied in this study with H5P in Moodle.

| Gamification activity | Example                                                                                                                        |
|-----------------------|--------------------------------------------------------------------------------------------------------------------------------|
| Crossword             | 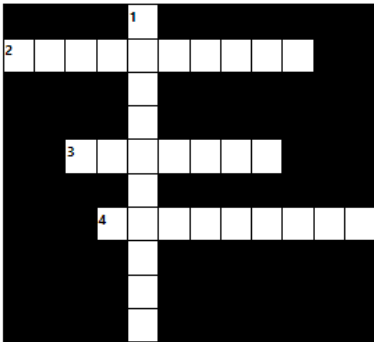 <p data-bbox="1193 821 1245 845">Check</p> |
| Find the Words        |                                             |

Memory Game

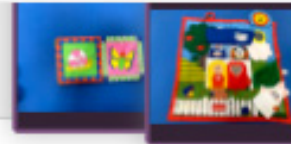

En los primeros meses del primer año de vida utilizamos materiales que sean atrayentes para captar la atención del niño o de la niña

Speak the  
Words Set

¿Qué es imaginar una imagen o una secuencia?

 Presione para hablar

 Reutilizar  Incrustar

True/False  
Question

La capacidad de representar se consolida en el periodo preoperacional. La capacidad de representar se consolida en el periodo preoperacional.

☐ Verdadero

☐ Falso

 Verificar

 Reutilizar  Incrustar
